# Supplementary material
Source: MDPI journal article supplement (https://www.mdpi.com/2073-445X/11/6/806)
Supplement: s1 [file s1]

**Table S1.** Longitude and latitude recorded by the brown eared pheasant.

| Longitude | Latitude | Time     | Type                |
|-----------|----------|----------|---------------------|
| 111.86    | 36.45    | 2020705  | Human Observation   |
| 111.80    | 38.00    | 2020     | Literature          |
| 111.46    | 37.83    | 2017     | Human Observation   |
| 111.50    | 37.89    | 206      | Human Observation   |
| 112.10    | 37.90    | 2016     | Literature          |
| 111.60    | 38.30    | 2016     | Literature          |
| 112.23    | 38.02    | 2021     | Human Observation   |
| 112.88    | 38.27    | 2020     | Human Observation   |
| 111.25    | 36.05    | 2019     | Literature          |
| 110.70    | 35.75    | 2017     | Literature          |
| 112.07    | 38.38    | 2015     | Machine observation |
| 111.45    | 36.72    | 2020     | Human Observation   |
| 112.01    | 36.78    | 2020     | Literature          |
| 112.09    | 37.56    | 20150419 | Human Observation   |
| 111.50    | 38.32    | 2016     | Human Observation   |
| 112.05    | 36.45    | 2013     | Literature          |
| 111.58    | 36.57    | 2015     | Machine observation |
| 111.95    | 38.67    | 2019     | Human Observation   |
| 111.46    | 37.24    | 2020     | Human Observation   |
| 111.33    | 37.02    | 2018     | Literature          |
| 112.18    | 38.67    | 2019     | Literature          |
| 111.67    | 36.57    | 2019     | Machine observation |
| 112.02    | 35.83    | 2019     | Human Observation   |
| 111.61    | 37.59    | 2017     | Machine observation |
| 111.63    | 37.38    | 2013     | Human Observation   |
| 111.75    | 37.50    | 2015     | Reports             |
| 111.92    | 36.49    | 20140705 | Literature          |
| 111.40    | 36.27    | 2013     | Human Observation   |
| 111.17    | 36.15    | 2013     | Literature          |
| 112.34    | 37.72    | 2017     | Human Observation   |
| 111.73    | 37.92    | 2016     | Reports             |
| 111.64    | 37.91    | 2016     | Machine observation |
| 111.99    | 37.90    | 2015     | Human Observation   |
| 111.12    | 35.89    | 2018     | Human Observation   |
| 110.98    | 35.70    | 2021     | Reports             |
| 111.33    | 36.12    | 2021     | Machine observation |
| 111.29    | 36.70    | 2017     | Human Observation   |
| 111.23    | 36.81    | 2018     | Machine observation |
| 111.17    | 36.91    | 2018     | Human Observation   |
| 111.35    | 36.94    | 2018     | Human Observation   |
| 111.41    | 37.17    | 2017     | Machine observation |
| 111.59    | 37.20    | 2019     | Human Observation   |
| 111.52    | 37.21    | 2016     | Human Observation   |
| 111.84    | 37.49    | 2016     | Human Observation   |
| 111.59    | 37.46    | 2017     | Human Observation   |
| 111.56    | 37.77    | 2012     | Human Observation   |
| 111.72    | 37.61    | 2012     | Human Observation   |
| 111.42    | 38.24    | 2018     | Human Observation   |
| 112.15    | 37.74    | 2019     | Human Observation   |

---

|        |       |          |                     |
|--------|-------|----------|---------------------|
| 111.69 | 38.08 | 2014     | Human Observation   |
| 112.46 | 38.15 | 2014     | Human Observation   |
| 112.39 | 38.08 | 2020     | Literature          |
| 112.04 | 38.56 | 2019     | Human Observation   |
| 112.02 | 36.58 | 20210411 | Human Observation   |
| 112.15 | 36.86 | 2021     | Human Observation   |
| 111.90 | 36.79 | 2017     | Machine observation |
| 111.71 | 36.81 | 2016     | Human Observation   |
| 111.93 | 36.86 | 2014     | Machine observation |
| 111.71 | 36.70 | 2018     | Human Observation   |
| 112.37 | 37.02 | 2013     | Human Observation   |
| 110.90 | 35.80 | 2020     | Literature          |
| 111.10 | 36.15 | 2020     | Literature          |
| 111.40 | 36.40 | 2020     | Literature          |
| 111.50 | 36.60 | 2020     | Literature          |
| 112.03 | 37.75 | 2021     | Human Observation   |
| 111.70 | 38.50 | 2020     | Literature          |
| 111.60 | 38.20 | 2020     | Literature          |
| 112.20 | 38.17 | 2018     | Human Observation   |
| 111.98 | 38.85 | 2018     | Human Observation   |

---
